# Supplementary material for: Catalytic conversion of syngas to mixed alcohols over CuFe-based catalysts derived from layered double hydroxides
Source: Royal Society of Chemistry journal article supplement (doi:10.1039/c3cy00025g), 2013-01-01
Supplement: c3cy00025g.pdf [file c3cy00025g.pdf]

Supporting Information for

**Catalytic conversion of syngas to mixed alcohols over CuFe-based catalysts derived from layered double hydroxides**

Wa Gao, Yufei Zhao, Junmin Liu, Qianwen Huang, Shan He, Changming Li, Jingwen Zhao  
and Min Wei\*

*State Key Laboratory of Chemical Resource Engineering, Beijing University of Chemical  
Technology, Beijing 100029, P. R. China*

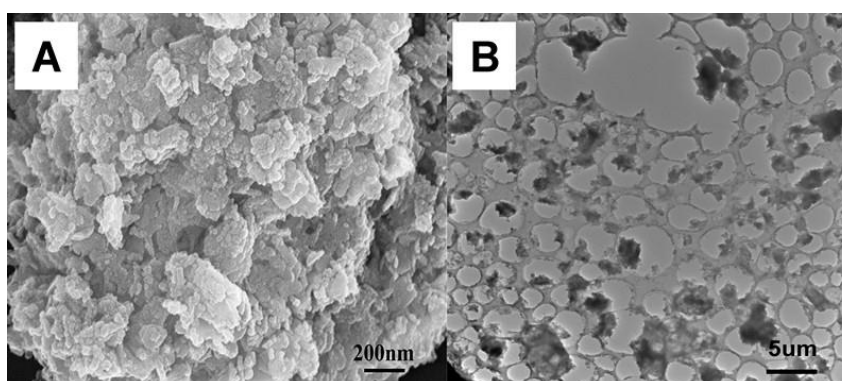

**Fig. S1** SEM (A) and TEM (B) image of the CP-CuFeMg-LDH precursor.

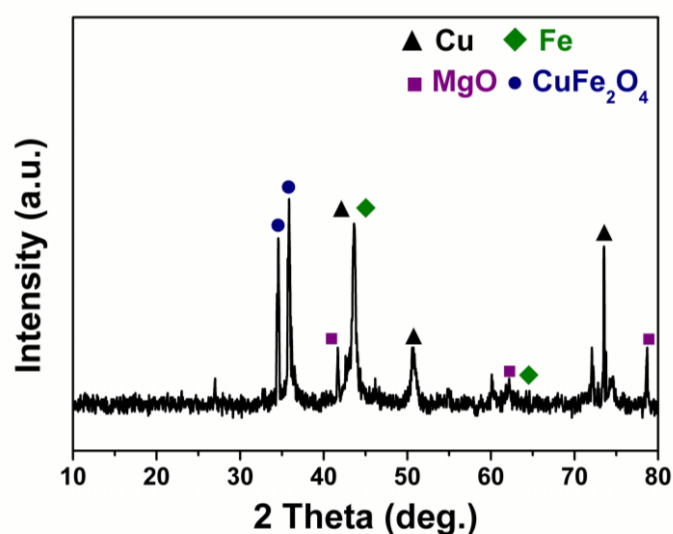

**Fig. S2** XRD pattern of the used S<sub>2</sub>-CuFeMg-Cat after reaction at 573 K for 48 h.

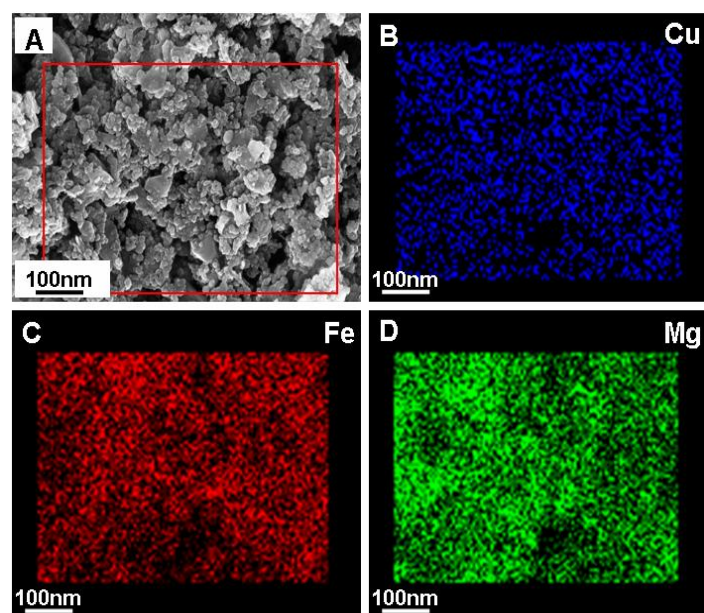

**Fig. S3** (A) SEM image, (B), (C), (D) SEM-EDX mapping of the used  $S_2$ -CuFeMg-Cat after reaction at 573 K for 48 h.

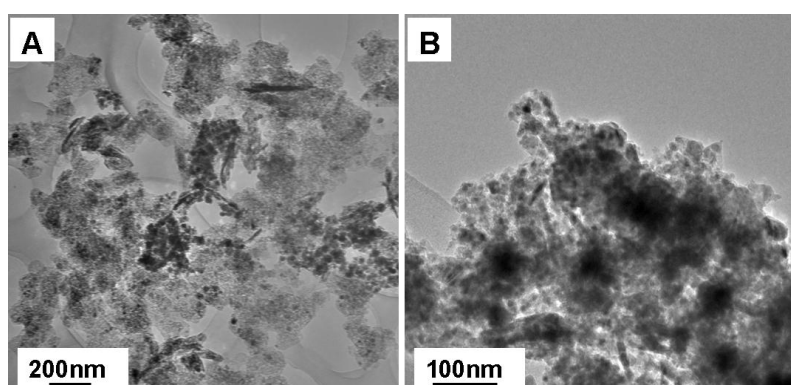

**Fig. S4** HRTEM images of the used  $S_2$ -CuFeMg-Cat after reaction at 573 K for 48 h.
